# Supplementary material for: One-pot synthesis of Ag/r-GO/TiO2 nanocomposites with high solar absorption and enhanced anti-recombination in photocatalytic applications
Source: Royal Society of Chemistry journal article supplement (doi:10.1039/c3nr05466g), 2014-01-01
Supplement: c3nr05466g1.pdf [file c3nr05466g1.pdf]

## Supporting Information

### **One-pot Synthesis of Ag/r-GO/TiO<sub>2</sub> Nanocomposites with High Solar Absorption and Enhanced Anti-Recombination in Photocatalytic Applications**

*Weiyin Gao,<sup>a</sup> Minqiang Wang,<sup>\*a</sup> Chenxin Ran,<sup>a</sup> Xi Yao,<sup>a</sup> Honghui Yang,<sup>b</sup> Jing Liu,<sup>a</sup>*

*Delong He,<sup>c</sup> and Jinbo Bai<sup>c</sup>*

<sup>a</sup>Xi'an Jiaotong University, Electronic Materials Research Laboratory, Key Laboratory of Education Ministry, Xi'an, Shaanxi 710049, P.R. China.

<sup>b</sup>Xi'an Jiaotong University, Department of Environmental Science and Technology, Xi'an, Shaanxi 710049, P.R. China.

<sup>c</sup>Lab. MSSMat, UMR CNRS8579, Ecole Central Paris, 92290 Châtenay malabry, France.

Corresponding Author: Minqiang Wang

E-mail: mqwang@mail.xjtu.edu.cn

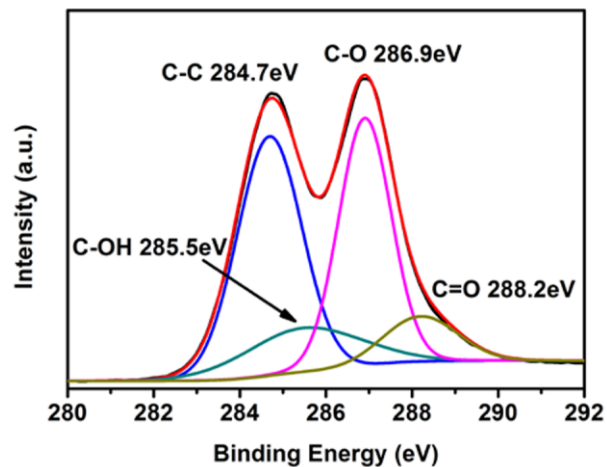

Figure S1 C1s XPS spectrum of GO.

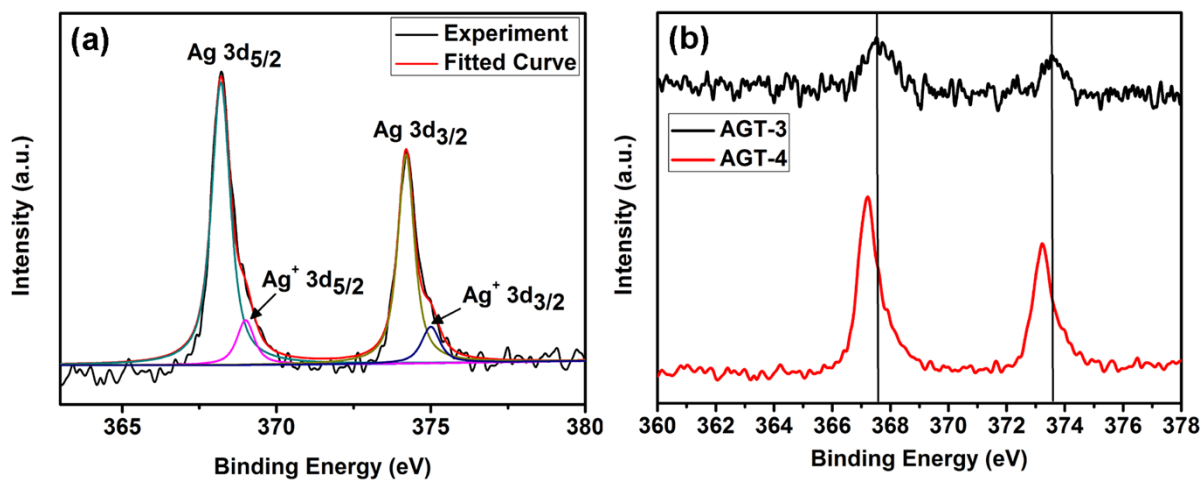

Figure S2 (a) Core level XPS spectra of Ag 3d pattern of AGT-4. (b) The comparison of Ag 3d pattern of AGT-3 and AGT-4 showing a red shift as the increased Ag content.

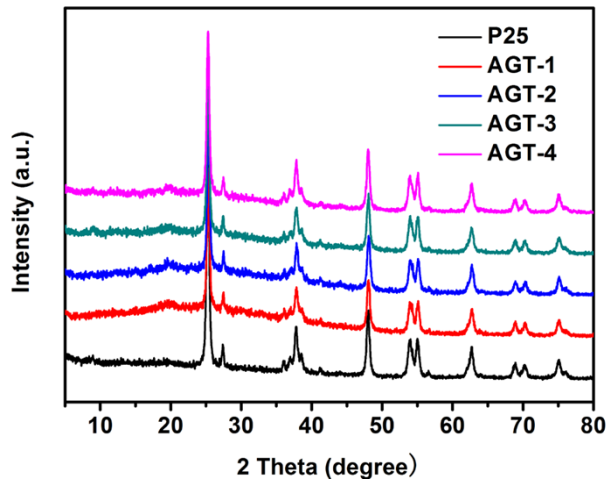

Figure S3 XRD patterns of P25 and AGT composites with different AgNO<sub>3</sub> content.

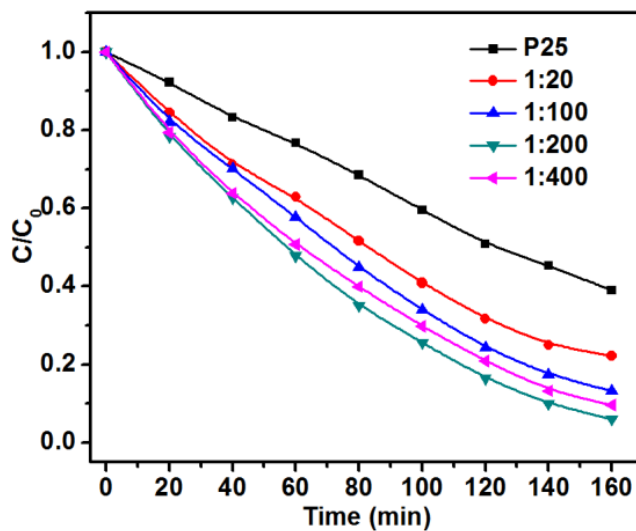

Figure S4 Photocatalytic degradation of RhB under the simulated sun light over P25 and r-GO/TiO<sub>2</sub> composites with different P25 content.

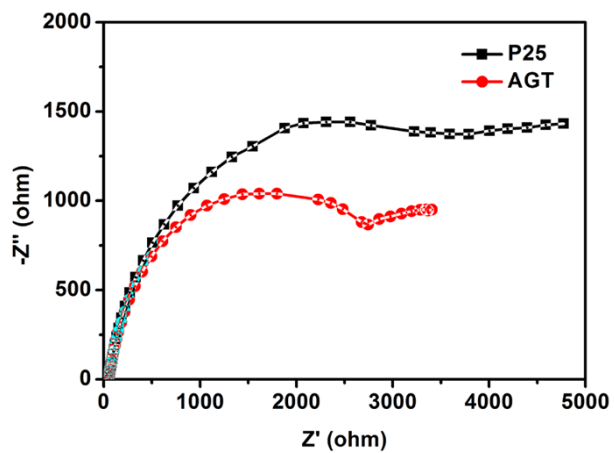

Figure S5 EIS changes of P25 and AGT electrodes. The EIS measurements were performed in the presence of a 2.5 mM  $K_3[Fe(CN)_6]/K_4[Fe(CN)_6]$  (1:1) mixture as a redox probe in 0.1 M KCl aqueous solution.

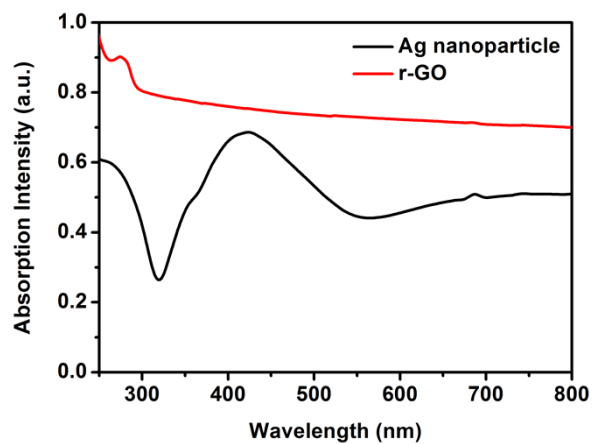

Figure S6 The absorption spectra of pure Ag nanoparticles and pure r-GO.

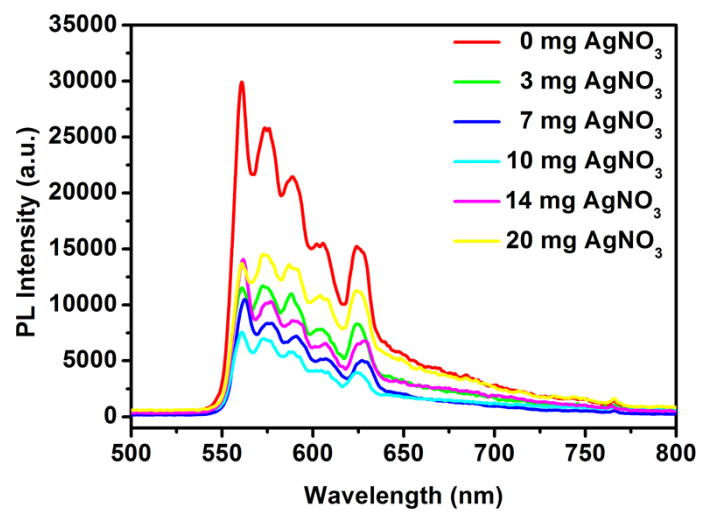

Figure S7 Photoluminescence spectra of AGT composites with different  $\text{AgNO}_3$  content.
